# Supplementary material for: FRAME: A phase I trial of defactinib (FAK inhibitor) in combination with avutometinib (RAF-MEK clamp) in patients with solid tumours including low grade serous ovarian cancer
Source: Research Square preprint supplement (doi:10.21203/rs.3.rs-5632942/v1), 2024-12-18
Supplement: Supplementary file 1 [file 2f231118b8aa2d4adaff9cb5.pdf]

## Reporting Summary

Nature Portfolio wishes to improve the reproducibility of the work that we publish. This form provides structure for consistency and transparency in reporting. For further information on Nature Portfolio policies, see our [Editorial Policies](#) and the [Editorial Policy Checklist](#).

### Statistics

For all statistical analyses, confirm that the following items are present in the figure legend, table legend, main text, or Methods section.

n/a | Confirmed

- The exact sample size ( $n$ ) for each experimental group/condition, given as a discrete number and unit of measurement
- A statement on whether measurements were taken from distinct samples or whether the same sample was measured repeatedly
- The statistical test(s) used AND whether they are one- or two-sided  
*Only common tests should be described solely by name; describe more complex techniques in the Methods section.*
- A description of all covariates tested
- A description of any assumptions or corrections, such as tests of normality and adjustment for multiple comparisons
- A full description of the statistical parameters including central tendency (e.g. means) or other basic estimates (e.g. regression coefficient) AND variation (e.g. standard deviation) or associated estimates of uncertainty (e.g. confidence intervals)
- For null hypothesis testing, the test statistic (e.g.  $F$ ,  $t$ ,  $r$ ) with confidence intervals, effect sizes, degrees of freedom and  $P$  value noted  
*Give  $P$  values as exact values whenever suitable.*
- For Bayesian analysis, information on the choice of priors and Markov chain Monte Carlo settings
- For hierarchical and complex designs, identification of the appropriate level for tests and full reporting of outcomes
- Estimates of effect sizes (e.g. Cohen's  $d$ , Pearson's  $r$ ), indicating how they were calculated

*Our web collection on [statistics for biologists](#) contains articles on many of the points above.*

### Software and code

Policy information about [availability of computer code](#)

Data collection

Data analysis

For manuscripts utilizing custom algorithms or software that are central to the research but not yet described in published literature, software must be made available to editors and reviewers. We strongly encourage code deposition in a community repository (e.g. GitHub). See the Nature Portfolio [guidelines for submitting code & software](#) for further information.

### Data

Policy information about [availability of data](#)

All manuscripts must include a [data availability statement](#). This statement should provide the following information, where applicable:

- Accession codes, unique identifiers, or web links for publicly available datasets
- A description of any restrictions on data availability
- For clinical datasets or third party data, please ensure that the statement adheres to our [policy](#)

## Research involving human participants, their data, or biological material

Policy information about studies with [human participants or human data](#). See also policy information about [sex, gender \(identity/presentation\), and sexual orientation](#) and [race, ethnicity and racism](#).

|                                                                    |                                                                                                            |
|--------------------------------------------------------------------|------------------------------------------------------------------------------------------------------------|
| Reporting on sex and gender                                        | This is a trial in cancer patients. Sex is mentioned in the table on demographics in supplementary table 1 |
| Reporting on race, ethnicity, or other socially relevant groupings | Ethnicity has been reported in table on demographics in Suppl table 1                                      |
| Population characteristics                                         | Data related to age was collected and presented in the table of demographics in the paper.                 |
| Recruitment                                                        | Inclusion criteria is was clarified in the manuscript and the protocol has also been uploaded.             |
| Ethics oversight                                                   | This protocol was passed through the UK National Ethics Committee                                          |

Note that full information on the approval of the study protocol must also be provided in the manuscript.

## Field-specific reporting

Please select the one below that is the best fit for your research. If you are not sure, read the appropriate sections before making your selection.

Life sciences  Behavioural & social sciences  Ecological, evolutionary & environmental sciences

For a reference copy of the document with all sections, see [nature.com/documents/nr-reporting-summary-flat.pdf](https://www.nature.com/documents/nr-reporting-summary-flat.pdf)

## Life sciences study design

All studies must disclose on these points even when the disclosure is negative.

|                 |                                                                                                                                                                                                                                                           |
|-----------------|-----------------------------------------------------------------------------------------------------------------------------------------------------------------------------------------------------------------------------------------------------------|
| Sample size     | Sample sizes in the dose escalation is predetermined in a 3+3 dose escalation design. The size of the dose expansions were empiric, however the statistical probability of of detecting a clinically meaningful difference is detailed in the manuscript. |
| Data exclusions | All patients who received at least one dose was eligible for evaluation of toxicity which is the primary end point of the study. Patients who consented but did not receive a dose of drug were not included for assessment for the primary endpoint.     |
| Replication     | Not applicable                                                                                                                                                                                                                                            |
| Randomization   | Not applicable                                                                                                                                                                                                                                            |
| Blinding        | Non blinded study                                                                                                                                                                                                                                         |

## Reporting for specific materials, systems and methods

We require information from authors about some types of materials, experimental systems and methods used in many studies. Here, indicate whether each material, system or method listed is relevant to your study. If you are not sure if a list item applies to your research, read the appropriate section before selecting a response.

### Materials & experimental systems

| n/a                                 | Involved in the study                                  |
|-------------------------------------|--------------------------------------------------------|
| <input type="checkbox"/>            | <input checked="" type="checkbox"/> Antibodies         |
| <input checked="" type="checkbox"/> | <input type="checkbox"/> Eukaryotic cell lines         |
| <input checked="" type="checkbox"/> | <input type="checkbox"/> Palaeontology and archaeology |
| <input checked="" type="checkbox"/> | <input type="checkbox"/> Animals and other organisms   |
| <input type="checkbox"/>            | <input checked="" type="checkbox"/> Clinical data      |
| <input checked="" type="checkbox"/> | <input type="checkbox"/> Dual use research of concern  |
| <input checked="" type="checkbox"/> | <input type="checkbox"/> Plants                        |

### Methods

| n/a                                 | Involved in the study                                      |
|-------------------------------------|------------------------------------------------------------|
| <input checked="" type="checkbox"/> | <input type="checkbox"/> ChIP-seq                          |
| <input checked="" type="checkbox"/> | <input type="checkbox"/> Flow cytometry                    |
| <input type="checkbox"/>            | <input checked="" type="checkbox"/> MRI-based neuroimaging |

## Antibodies

|                 |                                                                                            |
|-----------------|--------------------------------------------------------------------------------------------|
| Antibodies used | Antibodies used, source and concentrations have been detailed in the materials and methods |
|-----------------|--------------------------------------------------------------------------------------------|

Validation

Antibodies for immunohistochemistry in tumour tissue have been validated by western blot analysis

## Clinical data

Policy information about [clinical studies](#)

All manuscripts should comply with the ICMJE [guidelines for publication of clinical research](#) and a completed [CONSORT checklist](#) must be included with all submissions.

Clinical trial registration

NCT03875820/EudraCT number 2017-001035-39

Study protocol

Has been attached

Data collection

The dates when the trial was open has been detailed in the manuscript

Outcomes

Primary, secondary and tertiary objectives and endpoints have been detailed in the manuscript and in the uploaded protocol

## Plants

Seed stocks

N/A

Novel plant genotypes

N/A

Authentication

N/A

## Magnetic resonance imaging

### Experimental design

Design type

Routine standard of care imaging for RECIST measurement of tumour in cancer patients used in some cases.

Design specifications

CT and MRI scans were allowed for use in the protocol to measure disease as per RECIST, which are criteria used in clinical trials for cancer.

Behavioral performance measures

N/A

### Acquisition

Imaging type(s)

As per standard of care in the National Health Service, not a research measure

Field strength

As per standard of care in the National Health Service, not a research measure

Sequence &amp; imaging parameters

As per standard of care in the National Health Service, not a research measure

Area of acquisition

Abdomen/pelvis and brain where appropriate as a substitute for CT scans.

Diffusion MRI

 Used Not used

### Preprocessing

Preprocessing software

As per standard of care in the National Health Service, not a research measure

Normalization

As per standard of care in the National Health Service, not a research measure

Normalization template

As per standard of care in the National Health Service, not a research measure

Noise and artifact removal

As per standard of care in the National Health Service, not a research measure

Volume censoring

As per standard of care in the National Health Service, not a research measure

## Statistical modeling & inference

Model type and settings

Effect(s) tested

Specify type of analysis:  Whole brain  ROI-based  Both

Anatomical location(s)

Statistic type for inference

(See [Eklund et al. 2016](#))

Correction

## Models & analysis

n/a | Involved in the study

Functional and/or effective connectivity

Graph analysis

Multivariate modeling or predictive analysis
