# Supplementary material for: FRAME: A phase I trial of defactinib (FAK inhibitor) in combination with avutometinib (RAF-MEK clamp) in patients with solid tumours including low grade serous ovarian cancer
Source: Research Square preprint supplement (doi:10.21203/rs.3.rs-5632942/v1), 2024-12-18
Supplement: Supplementary file 1 [file 8d5c110b6854946eee217a2d.docx]

**Materials and methods online**

**Compliance with reporting guidelines**

The CONSORT-DEFINE checklist for early phase dose-finding trials, alongside the study protocol1, has been provided in the extended data, to enhance transparency and ensure accurate reporting of the study's findings.

**Trial objectives**

The primary objective of this study was to recommend a phase II dose and to characterize the safety profile for the combination of avutomenib and defactinib. The secondary endpoint included establishing the pharmacokinetic profile of avutometinib and defactinib administered together. The tertiary endpoints included characterizing the clinical efficacy of the combination in patients with solid tumours, studying the pharmacodynamic profile of both drugs and to assess biomarkers of sensitivity and resistance to the combination.

**Determination of starting dose**

A clinical trial of avutometinib administered as a single agent determined the maximal tolerated dose of avutometinib as 4 mg twice a week (Mon-Thu or Tues-Friday) on a 3 weeks ‘on’ one week ‘off’, 28 day schedule 2. The starting dose for this combination phase I study was 3.2 mg delivered at the same schedule and it was lower than the single agent dose. Phase I trials of defactinib evaluated doses between 12-750 mg BD 3 and single agent phase 2 and trials were conducted at a dose of 400 mg BD 4,5. The starting dose of defactinib in this combination study was at a lower dose i.e. 200 mg BD.

**Trial design**

This study followed a modified 3+3 dose escalation design. Scheme shown in Figure 1. If dose level 1 was tolerated, dose level 2a and 2b were opened simultaneously. If either dose level 2a or 2b were not tolerated, dose level 3 would not be explored. Following recommending of a phase 2 dose (RP2D), Multiple expansion cohorts were opened. Following establishment of a recommended dose, tumour expansion cohorts were studied. Dose level 2a was selected as the initial RP2D (See text in results section). Version 1.0 of the protocol, dated 7th September 2017, featured two initial expansion cohorts (*KRAS* mutated NSCLC; RAS/RAF enriched solid tumour biopsy cohort). After 10 patients in the NSCLC cohort and 7 patients in the STC cohort had been treated with dose level 2b, the decision was made to update the RP2D to be dose level 1. additional expansion cohorts were introduced by amendments to the protocol in version 2.6 dated 4th April 2019 (LGSOC; CRC) and version 4.0 dated 30th June 2020 (PC; EOC; G12V – NSCLC).

Tumour types are described in Figure 1 of the main text. The planned cohort sizes of 10-20 patients were not based on formal calculations. However, it was estimated that with 80 patients in total in the expansion cohorts, the probability of seeing 0 responses was <0.1% if the true response rate was 20%, and the probability of seeing 2 or more responses was 99.9%. The 80% confidence interval if the response rate was 10% was [6.4%; 16.0%], the 80% confidence interval if the response rate was 20% was [14.3%; 26.4%], and the 80% confidence interval if the response rate was 30% was [23.7%; 37.5%].

**Statistical Methods**

Analysis populations

- Safety population: This population includes any patient who received at least one administration of the IMPs, VS-6766 [avutometinib] and/or defactinib.
- Intention to treat (ITT) population: This population contains all patients enrolled into the study (regardless of whether they were later found to be ineligible, a protocol violator, given the wrong treatment/dose allocation, never treated etc.).
- Response evaluable patient (REP) population: Patients must have received at least one cycle of the trial medication, have had a baseline RECIST assessment and at least one post baseline RECIST assessment to be evaluable for response. Patients who progressed prior to the first scheduled post baseline RECIST assessment were still evaluable for response.
- DLT evaluable population: All eligible dose escalation patients who received the combination of VS-6766 [avutometinib] and defactinib and either:
  - completed minimum safety evaluation requirements and received at least 5 out of 6 doses of VS-6766 [avutometinib] (or 5 out of 7 doses in patients requiring the run-in dose) and 32 out of 42 doses of defactinib during the first cycle at a specified new dose level

or

- - experienced a DLT during the first cycle at a specified new dose level.

Baseline characteristics are presented descriptively. Median follow-up was calculated using the reverse Kaplan-Meier approach. Objective response rates are presented with their 95% confidence intervals. Median progression-free survival, defined as the time from the first combination dose to progression or death, was estimated using the Kaplan-Meier method and shown together with a 95% confidence interval. Waterfall plots were used to graphically present best percentage change from baseline of the sum of lesion diameters according to RECIST v1.1. A swimmer plot was utilized to display progression free survival by patient and previous MEK inhibitor treatment for all LGSOC patients.

**Participants**

Patients aged 18 years or older were eligible for the study. Inclusion criteria Haemoglobin > 9 g/d, absolute neutrophil count of >1.5 x109 /L, platelet count of > 100 x109 /L, bilirubin < 1.5 upper limit of normal, AST and ALT of < 2.5 upper limit of normal if no liver metastasis was present or < 5 upper limit of norma if lever metastasis was present. A calculated creatinine clearance of > 50 mL/min or a serum creatinine of <1.5 upper limit of normal was permissible. Patients had to have a corrected QT interval (QTc) of <470 milliseconds. Exclusion criteria chemotherapy, endocrine therapy, biological therapy, immunotherapy or radiotherapy (except for palliative radiotherapy) within the last 4 weeks. Major surgery in the last 4 weeks was an exclusion criterion as was a known history of gilberts syndrome and history of acute or chronic pancreatitis. Specific exclusion criteria for ocular disease included history of glaucoma, history of retinal vein occlusion and features predisposing to retinal vein occlusion such as uncontrolled hypertension and uncontrolled diabetes. Patients administer a strong CYP3A4 and strong CYP2C9 inhibitor for the last 7 days prior to the first dose of trial medication were excluded.

**Toxicity assessment**

Toxicity was assessed by CTC AE V4. Patients were seen on every week for the first 8 weeks on treatment and every 4 weeks following that. Dose limiting toxicity (DLT) were any event that was deemed highly probably or probably related to avutometinib or defactinib in the first cycle of treatment and included grade 4 neutropenia, > grade 3 thrombocytopenia associated with clinically significant bleeding, febrile neutropenia, infection associated with grade 3 or 4 neutropenia, > grade 3 increase in bilirubin associated with grade 3 or grade 4 elevation of aspartate transaminase and alanine transaminase. Grade 3 skin toxicity occurring after dose reduction or if grade 3 skin toxicity persists for 2 weeks after appropriate supportive measures and grade 3 ophthalmological toxicity were deemed as DLTs. Inability to receive at least 5 doses of avutometinib and at least 32 doses of defactinib in cycle 1 and delay in starting cycle 2 by > 2 weeks due to treatment related toxicity which have not resolved to baseline or < grade 1 were considered DLTs. Drug related grade 5 toxicity or any other toxicity that the investigator deemed dose limiting was considered a DLT. Alopecia or any grade and isolated laboratory changes of any grade without clinical significance or clinical sequela were not considered DLTs. Grade 3 or grade 4 toxicity of any other organ was deemed a DLT with the following exceptions, grade 3 or 4 nausea or vomiting unless patients had received optimal antiemetics, grade 3 or 4 diarrhea unless patents had received optimal anti-diarrheal treatment, grade 3 or 4 AST or ALT unless it increased more than 2 or more grade since baseline, grade 3 bilirubin, grade 3 CPK elevation

**Pharmacokinetics**

Pharmacokinetic sampling was conducted on the day of avutometinib dosing the second or third week of dosing i.e. in cycle 1 between day 8-21. Samples were collected at pre-dose, 30 minutes, 1 hr, 2 hr, 4 hr, 8 hr, 12 hr, 24 hr and 48 hr. The plasma concentrations of Avutometinib and Defactinib were obtained by liquid chromatography-mass spectrometry (LC-MS). Pharmacokinetic parameters such as maximum plasma concentration (Cmax), terminal half-life (t1/2) and area under the plasma concentration versus time curve (AUC) were calculated using non-compartmental analysis (Phoenix v8.1, Certara).

**Pharmacodynamics**

In patients who consented to biopsies, three biopsies were conducted. Patients had a pre-treatment biopsy, then had a run-in dose of avutometinib between -7 to -3 days of starting combination therapy. The second biopsy was conducted within 4-24 hrs of the run-in dose. The third biopsy was conducted at 4-24 hrs after a dose of avutometinib within 2 weeks of starting cycle 2. The phosphorylation of MEK (Ser222) ERK (Thr185/Try187) was assessed by antibody-bread based Luminex system6. Phosphorylation of cytoplasmic FAK was assessed by immunohistochemistry. Primary antibody used was p-FAK (Tyr397) antibody clone D20B1 (8556) Cell signaling technologies Leiden Netherlands. Detection was with Dako envision flex + rabbit linker.

**Response evaluation**

Response evaluation was conducted up CT or MRI using RECIST 1.1. Scans were conducted at baseline and every 8 weeks up to cycle 6 following which scans were done at 8-12 weeks at investigators discretion.

**Ethical considerations**

The trial was conducted as per the principles of the declaration of Helsinki. The protocol was reviewed and allowed to proceed by the Medicines and Healthcare products Regulatory Agency (MHRA) UK. The protocol was also reviewed by the National research and ethics committee REC/LO/1473. EudraCT number 2017-001035-39, NCT03875820.

**Trial administration**

The trial was conducted across 4 units, the Drug Development Unit at the Royal Marsden NHS Foundation Trust, London, UK, the Gynecological Unit at The Royal Marsden NHS Foundation Trust, London, UK, The Christie Hospital, Manchester, UK and The Newcastle Upon Tyne Hospital NHS Foundation Trust, Newcastle upon Tyne, UK. The academic sponsor of the trial was The Institute of Cancer Research and The Royal Marsden Hospital NHS Foundation Trust. The trial funding was provided by Verastem Oncology and Chugai pharmaceutical company. Two weekly safety review committee meetings were held to evaluate toxicity with the CI or CI delegate and PI or PI delegate for every site with a patient on study. Dose escalation decisions were made by the safety review committee with the addition of an external independent clinician from the Experimental Cancer Medicine Centre who was not taking part in the study who had time to review the toxicity and efficacy presented at the dose escalation meeting.

**Data Availability**

The anonymized derived data from this study that underly the results will be made available upon consideration of a reasonable scientific proposal by the sponsoring institutions. Requests are to be sent to the corresponding author.

**Presentation of data at conferences**

The results of the FRAME trial has been presented at

Annual meeting of the American Association of cancer research 2020. Cancer Res 2020, 80(16_ Supplement):CT143.

**Acknowledgements**

The authors acknowledge funding from Chugai Pharmaceuticals and Verastem Oncology towards running this study. The authors also acknowledge infrastructural funding from the Experimental Cancer Centre Initiative and the National Institute of Heath Sciences (NIHR) Biomedical Research Centre to participating Centers. The authors from the Institute of Cancer Research acknowledge funding from the Cancer Research UK Convergence Science Centre grant and programmatic infrastructure funding from Cancer Research UK (C1491/A25351). UB was a recipient of the NIHR grant RP-2016-07-028.

**References**

1. Yap, C.*, et al.* Enhancing reporting quality and impact of early phase dose-finding clinical trials: CONSORT Dose-finding Extension (CONSORT-DEFINE) guidance. *BMJ* **383**, e076387 (2023).

2. Guo, C.*, et al.* Intermittent schedules of the oral RAF-MEK inhibitor CH5126766/VS-6766 in patients with RAS/RAF-mutant solid tumours and multiple myeloma: a single-centre, open-label, phase 1 dose-escalation and basket dose-expansion study. *Lancet Oncol* **21**, 1478-1488 (2020).

3. Jones, S.F.*, et al.* A phase I study of VS-6063, a second-generation focal adhesion kinase inhibitor, in patients with advanced solid tumors. *Invest New Drugs* **33**, 1100-1107 (2015).

4. Fennell, D.A.*, et al.* Maintenance Defactinib Versus Placebo After First-Line Chemotherapy in Patients With Merlin-Stratified Pleural Mesothelioma: COMMAND-A Double-Blind, Randomized, Phase II Study. *J Clin Oncol* **37**, 790-798 (2019).

5. Gerber, D.E.*, et al.* Phase 2 study of the focal adhesion kinase inhibitor defactinib (VS-6063) in previously treated advanced KRAS mutant non-small cell lung cancer. *Lung Cancer* **139**, 60-67 (2020).

6. Stewart, A.*, et al.* Differences in Signaling Patterns on PI3K Inhibition Reveal Context Specificity in KRAS-Mutant Cancers. *Mol Cancer Ther* **18**, 1396-1404 (2019).
